# Supplementary material for: A Serodiagnostic IgM ELISA to Detect Acute Cytauxzoonosis
Source: MDPI journal article supplement (doi:10.3390/pathogens11101183), 2022-10-14
Supplement: s1 [file s1]

**Table S1.**Result of Blood Smear Evaluation<sup>†</sup> of Group 2 Blood Samples.

| Cat ID | IgM ELISA result<br>(percent positive) | Total number of<br>piroplasms observed | Total number of schizont-laden<br>monocytes in 2 blood smears | Determination of<br><i>C. felis</i> infection<br>(ddPCR) |
|--------|----------------------------------------|----------------------------------------|---------------------------------------------------------------|----------------------------------------------------------|
| 201    | 104.2                                  | 344                                    | 0                                                             | Positive                                                 |
| 202    | 20.6                                   | 0                                      | 0                                                             | Positive                                                 |
| 204    | 34.1                                   | 61                                     | 4                                                             | Positive                                                 |
| 205    | 9.4*                                   | 2                                      | 0                                                             | Positive                                                 |
| 206    | 74.7                                   | 2                                      | 0                                                             | Positive                                                 |
| 207    | 107.5                                  | 33                                     | 0                                                             | Positive                                                 |
| 208    | 59.4                                   | 1                                      | 0                                                             | Positive                                                 |
| 209    | 8.9*                                   | 1                                      | 0                                                             | Positive                                                 |
| 210    | 40.8                                   | 14                                     | 1                                                             | Positive                                                 |
| 211    | 63.4                                   | 3                                      | 0                                                             | Positive                                                 |
| 212    | 28.4                                   | 208                                    | 0                                                             | Positive                                                 |
| 213    | 52.2                                   | 11                                     | 0                                                             | Positive                                                 |
| 214    | 104.7                                  | 11                                     | 0                                                             | Positive                                                 |
| 215    | 109.6                                  | 542                                    | 0                                                             | Positive                                                 |
| 216    | 102.9                                  | 10                                     | 11                                                            | Positive                                                 |
| 217    | 75.4                                   | 2                                      | 0                                                             | Positive                                                 |
| 218    | 115.0                                  | 8                                      | 0                                                             | Positive                                                 |
| 219    | 112.2                                  | 7                                      | 0                                                             | Positive                                                 |
| 220    | 98.6                                   | 28                                     | 0                                                             | Positive                                                 |
| 221    | 110.0                                  | 10                                     | 2                                                             | Positive                                                 |
| 222    | 98.8                                   | N/A                                    | N/A                                                           | Positive                                                 |
| 223    | 88.8                                   | 7                                      | 0                                                             | Positive                                                 |
| 224    | 70.8                                   | 21                                     | 2                                                             | Positive                                                 |
| 225    | 80.7                                   | 21                                     | 0                                                             | Positive                                                 |
| 226    | 78.9                                   | 52                                     | 0                                                             | Positive                                                 |
| 227    | 69.9                                   | 5                                      | 0                                                             | Positive                                                 |
| 228    | 43.2                                   | 460                                    | 4                                                             | Positive                                                 |
| 229    | 88.3                                   | 203                                    | 0                                                             | Positive                                                 |
| 230    | 88.5                                   | 179                                    | 1                                                             | Positive                                                 |
| 231    | 100.0                                  | 183                                    | 0                                                             | Positive                                                 |
| 232    | 64.2                                   | 9                                      | 0                                                             | Positive                                                 |
| 233    | 50.1                                   | 7                                      | 0                                                             | Positive                                                 |
| 234    | 55.6                                   | 0                                      | 2                                                             | Positive                                                 |
| 235    | 55.9                                   | 608                                    | 0                                                             | Positive                                                 |
| 236    | 22.8                                   | N/A                                    | N/A                                                           | Positive                                                 |
| 237    | 50.6                                   | 164                                    | 0                                                             | Positive                                                 |

\*Weak positive IgM ELISA result

<sup>†</sup> For each sample, duplicate blood smears were made when available and evaluated for presence of *C. felis* organisms. The method of blood smear evaluation was described as previously published (Kao et al., 2021). Among the 36 samples, blood smears were not available in 2 samples (222, 236) and were marked as N/A (not applicable).

**Table S2.**Result of Blood Smear Evaluation<sup>†</sup> of Group 3 Blood Samples.

| Cat ID | IgM ELISA result<br>(percent positive) | Total number of<br>piroplasms observed | Total number of schizont-laden<br>monocytes in 2 blood smears | Determination of<br><i>C. felis</i> infection<br>(ddPCR) |
|--------|----------------------------------------|----------------------------------------|---------------------------------------------------------------|----------------------------------------------------------|
| 301    | 5.4                                    | 0                                      | 0                                                             | Negative                                                 |
| 302    | 8.3                                    | 0                                      | 0                                                             | Negative                                                 |
| 303    | 4.1                                    | 0                                      | 0                                                             | Negative                                                 |
| 304    | 12.3*                                  | 0                                      | 0                                                             | Negative                                                 |
| 305    | 5.6                                    | 0                                      | 0                                                             | Negative                                                 |
| 306    | 8.2                                    | 0                                      | 0                                                             | Negative                                                 |
| 307    | 4.5                                    | 0                                      | 0                                                             | Negative                                                 |
| 308    | 10.0*                                  | 0                                      | 0                                                             | Negative                                                 |
| 309    | 3.2                                    | 0                                      | 0                                                             | Negative                                                 |
| 310    | 3.8                                    | 0                                      | 0                                                             | Negative                                                 |

\*Weak positive IgM ELISA result

<sup>†</sup> For each sample, duplicate blood smears were made when available and evaluated for presence of *C. felis* organisms. The method of blood smear evaluation was described as previously published (Kao et al., 2021).
