# Supplementary material for: A Serodiagnostic IgM ELISA to Detect Acute Cytauxzoonosis
Source: MDPI journal article supplement (doi:10.3390/pathogens11101183), 2022-10-14
Supplement: s1 [file s1]

Data Summary

| Group 1 |                                        |                                        |                                      |
|---------|----------------------------------------|----------------------------------------|--------------------------------------|
| Cat ID  | IgM ELISA result<br>(percent positive) | IgG ELISA result<br>(percent positive) | <i>C. felis</i> cox3<br>ddPCR result |
| 101     | 5.9                                    | 5.2                                    | Negative                             |
| 102     | 3.9                                    | 4.9                                    | Negative                             |
| 103     | 3.7                                    | 4.8                                    | Negative                             |
| 104     | 5.7                                    | 6.6                                    | Negative                             |
| 105     | 5.2                                    | 6.3                                    | Negative                             |
| 106     | 4.6                                    | 5.8                                    | Negative                             |
| 107     | 4.9                                    | 8.7                                    | Negative                             |
| 108     | 4.2                                    | 6                                      | Negative                             |
| 109     | 19.1                                   | 6.4                                    | Negative                             |
| 110     | 5.1                                    | 4.3                                    | Negative                             |
| 111     | 4.7                                    | 5.2                                    | Negative                             |
| 112     | 4.3                                    | 5                                      | Negative                             |
| 113     | 10.2                                   | 4.2                                    | Negative                             |
| 114     | 3.4                                    | 5.5                                    | Negative                             |
| 115     | 6.7                                    | 6.2                                    | Negative                             |
| 116     | 4.1                                    | 5.2                                    | Negative                             |
| 117     | 4.3                                    | 5.7                                    | Negative                             |
| 118     | 6.2                                    | 5.1                                    | Negative                             |
| 119     | 7                                      | 7.1                                    | Negative                             |
| 120     | 6.8                                    | 6.8                                    | Negative                             |
| 121     | 4                                      | 6.7                                    | Negative                             |
| 122     | 7.3                                    | 6.9                                    | Negative                             |

IgM ELISA

Strong positive cut-off: 19.85 percent positive  
Weak positive cut-off: 8.60 percent positive

IgG ELISA

Positive cut-off: 9.90 percent positive

| Group 2 |                                        |                                        |                                      |
|---------|----------------------------------------|----------------------------------------|--------------------------------------|
| Cat ID  | IgM ELISA result<br>(percent positive) | IgG ELISA result<br>(percent positive) | <i>C. felis</i> cox3<br>ddPCR result |
| 201     | 104.2                                  | 43.5                                   | Positive                             |
| 202     | 20.6                                   | 15.3                                   | Positive                             |
| 204     | 34.1                                   | 10.8                                   | Positive                             |
| 205     | 9.4                                    | 53.6                                   | Positive                             |
| 206     | 74.7                                   | 18.7                                   | Positive                             |
| 207     | 107.5                                  | 105.1                                  | Positive                             |
| 208     | 59.4                                   | 35.5                                   | Positive                             |
| 209     | 8.9                                    | 45.5                                   | Positive                             |
| 210     | 40.8                                   | 38.6                                   | Positive                             |
| 211     | 63.4                                   | 11.1                                   | Positive                             |
| 212     | 28.4                                   | 32.7                                   | Positive                             |
| 213     | 52.2                                   | 58.1                                   | Positive                             |
| 214     | 104.7                                  | 21.6                                   | Positive                             |
| 215     | 109.6                                  | 56.5                                   | Positive                             |
| 216     | 102.9                                  | 78.7                                   | Positive                             |
| 217     | 75.4                                   | 12.6                                   | Positive                             |
| 218     | 115                                    | 79.7                                   | Positive                             |
| 219     | 112.2                                  | 92.9                                   | Positive                             |
| 220     | 98.6                                   | 54.2                                   | Positive                             |
| 221     | 110                                    | 79.7                                   | Positive                             |
| 222     | 98.8                                   | 79.3                                   | Positive                             |
| 223     | 88.8                                   | 76.1                                   | Positive                             |
| 224     | 70.8                                   | 49.4                                   | Positive                             |
| 225     | 80.7                                   | 31.6                                   | Positive                             |
| 226     | 78.9                                   | 71.5                                   | Positive                             |
| 227     | 69.9                                   | 81.7                                   | Positive                             |
| 228     | 43.2                                   | 53.6                                   | Positive                             |
| 229     | 88.3                                   | 74.5                                   | Positive                             |
| 230     | 88.5                                   | 36.5                                   | Positive                             |
| 231     | 100                                    | 71.4                                   | Positive                             |
| 232     | 64.2                                   | 28.8                                   | Positive                             |
| 233     | 50.1                                   | 28.1                                   | Positive                             |
| 234     | 55.6                                   | 50.4                                   | Positive                             |
| 235     | 55.9                                   | 12.5                                   | Positive                             |
| 236     | 22.8                                   | 79.7                                   | Positive                             |
| 237     | 50.6                                   | 14.3                                   | Positive                             |

| Group 3 |                                        |                                        |                                      |
|---------|----------------------------------------|----------------------------------------|--------------------------------------|
| Cat ID  | IgM ELISA result<br>(percent positive) | IgG ELISA result<br>(percent positive) | <i>C. felis</i> cox3<br>ddPCR result |
| 301     | 5.4                                    | 5.2                                    | Negative                             |
| 302     | 8.3                                    | 3.7                                    | Negative                             |
| 303     | 4.1                                    | 4.1                                    | Negative                             |
| 304     | 12.3                                   | 3.4                                    | Negative                             |
| 305     | 5.6                                    | 5.4                                    | Negative                             |
| 306     | 8.2                                    | 4.3                                    | Negative                             |
| 307     | 4.5                                    | 4.2                                    | Negative                             |
| 308     | 10                                     | 2.6                                    | Negative                             |
| 309     | 3.2                                    | 2.6                                    | Negative                             |
| 310     | 3.8                                    | 48.3                                   | Negative                             |

| Group 4 |                                        |                                        |                                      |
|---------|----------------------------------------|----------------------------------------|--------------------------------------|
| Cat ID  | IgM ELISA result<br>(percent positive) | IgG ELISA result<br>(percent positive) | <i>C. felis</i> cox3<br>ddPCR result |
| 401     | 7.5                                    | 15.6                                   | Positive                             |
| 402     | 17.3                                   | 15.9                                   | Positive                             |
| 403     | 40.3                                   | 30.3                                   | Positive                             |
| 404     | 11.4                                   | 54.6                                   | Positive                             |

| Original ID |     | Cat ID   | ddPCR  | Plate I |        | Plate II |        | Plate I Mean |         | Plate I Std | Plate I CV | %PP    | Plate II Mean |            | Plate II Std | Plate II CV | %PP      | Inter plate m |     | Inter plate St | Interplate CV | All sample PP |  |
|-------------|-----|----------|--------|---------|--------|----------|--------|--------------|---------|-------------|------------|--------|---------------|------------|--------------|-------------|----------|---------------|-----|----------------|---------------|---------------|--|
| Dexter      | 201 | positive | 3.0298 | 3.0019  | 5/6/21 | 3.431    | 3.325  | 5/6/21       | 3.01585 | 0.01972828  | 1%         | 98.7%  | 3.378         | 0.07495332 | 2%           | 109.6%      | 3.196925 | 0.25607872    | 8%  | 104.2%         |               |               |  |
| 0501 d0     | 202 | positive | 0.5047 | 0.5342  | 5/6/21 | 0.7667   | 0.7231 | 5/6/21       | 0.51945 | 0.02085965  | 4%         | 17.0%  | 0.7449        | 0.03082986 | 4%           | 24.2%       | 0.632175 | 0.15941722    | 25% | 20.6%          |               |               |  |
| 0801 d0     | 204 | positive | 0.8787 | 0.9023  | 5/6/21 | 1.2015   | 1.1967 | 5/6/21       | 0.8905  | 0.01668772  | 2%         | 29.2%  | 1.1991        | 0.00339411 | 0%           | 38.9%       | 1.0448   | 0.21821315    | 21% | 34.1%          |               |               |  |
| 1501 d0     | 205 | positive | 0.2525 | 0.2606  | 5/6/21 | 0.3314   | 0.3036 | 5/6/21       | 0.25655 | 0.00572756  | 2%         | 8.4%   | 0.3175        | 0.01965757 | 6%           | 10.3%       | 0.287025 | 0.04309816    | 15% | 9.4%           |               |               |  |
| 1502 d0     | 206 | positive | 2.1745 | 2.0449  | 5/6/21 | 2.519    | 2.4219 | 5/6/21       | 2.1097  | 0.09164104  | 4%         | 69.1%  | 2.47045       | 0.06866007 | 3%           | 80.2%       | 2.290075 | 0.25508877    | 11% | 74.7%          |               |               |  |
| 1503 d0     | 207 | positive | 3.271  | 3.2298  | 5/6/21 | 3.3502   | 3.3348 | 5/6/21       | 3.2504  | 0.0291328   | 1%         | 106.4% | 3.3425        | 0.01088944 | 0%           | 108.5%      | 3.29645  | 0.06512453    | 2%  | 107.5%         |               |               |  |
| 1505 d0     | 208 | positive | 1.7005 | 1.6161  | 5/6/21 | 1.9838   | 1.9894 | 5/6/21       | 1.6583  | 0.05967981  | 4%         | 54.3%  | 1.9866        | 0.0039598  | 0%           | 64.5%       | 1.82245  | 0.23214316    | 13% | 59.4%          |               |               |  |
| 1506 d0     | 209 | positive | 0.2431 | 0.2481  | 5/6/21 | 0.2981   | 0.3024 | 5/6/21       | 0.2456  | 0.00353553  | 1%         | 8.0%   | 0.30025       | 0.00304056 | 1%           | 9.7%        | 0.272925 | 0.03864339    | 14% | 8.9%           |               |               |  |
| 1507 d0     | 210 | positive | 1.1209 | 1.1712  | 5/6/21 | 1.3311   | 1.381  | 5/6/21       | 1.14605 | 0.03556747  | 3%         | 37.5%  | 1.35605       | 0.03528463 | 3%           | 44.0%       | 1.25105  | 0.14849242    | 12% | 40.8%          |               |               |  |
| 1508 d0     | 211 | positive | 1.7495 | 1.835   | 5/6/21 | 2.1052   | 2.0893 | 5/6/21       | 1.79225 | 0.06045763  | 3%         | 58.7%  | 2.09725       | 0.011243   | 1%           | 68.1%       | 1.94475  | 0.21566757    | 11% | 63.4%          |               |               |  |
| 0901 d0     | 212 | positive | 0.7568 | 0.7898  | 5/6/21 | 0.9348   | 1.0039 | 5/6/21       | 0.7733  | 0.02333452  | 3%         | 25.3%  | 0.96935       | 0.04886108 | 5%           | 31.5%       | 0.871325 | 0.13862828    | 16% | 28.4%          |               |               |  |
| 0902 d0     | 213 | positive | 1.6809 | 1.426   | 5/6/21 | 1.6444   | 1.6601 | 5/6/21       | 1.55345 | 0.18024152  | 12%        | 50.9%  | 1.65225       | 0.01110158 | 1%           | 53.6%       | 1.60285  | 0.06986215    | 4%  | 52.2%          |               |               |  |
| Squeaky     | 214 | positive | 3.1672 | 3.1515  | 5/6/21 | 3.2647   | 3.2588 | 5/6/21       | 3.15935 | 0.01110158  | 0%         | 103.4% | 3.26175       | 0.00417193 | 0%           | 105.9%      | 3.21055  | 0.07240773    | 2%  | 104.7%         |               |               |  |
| 0302 d0     | 215 | positive | 3.3665 | 3.3422  | 5/6/21 | 3.3821   | 3.3538 | 5/6/21       | 3.35435 | 0.01718269  | 1%         | 109.8% | 3.36795       | 0.02001112 | 1%           | 109.3%      | 3.36115  | 0.00961665    | 0%  | 109.6%         |               |               |  |
| 0703 d0     | 216 | positive | 3.1092 | 3.0758  | 5/6/21 | 3.2328   | 3.2142 | 5/6/21       | 3.0925  | 0.02361737  | 1%         | 101.3% | 3.2235        | 0.01315219 | 0%           | 104.6%      | 3.158    | 0.09263099    | 3%  | 102.9%         |               |               |  |
| 0903 d0     | 217 | positive | 2.1725 | 2.2089  | 5/6/21 | 2.4409   | 2.4353 | 5/6/21       | 2.1907  | 0.02573869  | 1%         | 71.7%  | 2.4381        | 0.0039598  | 0%           | 79.1%       | 2.3144   | 0.17493822    | 8%  | 75.4%          |               |               |  |
| 1201 d0     | 218 | positive | 3.528  | 3.5064  | 5/6/21 | 3.5286   | 3.5495 | 5/6/21       | 3.5172  | 0.01527351  | 0%         | 115.2% | 3.53905       | 0.01477853 | 0%           | 114.9%      | 3.528125 | 0.01545028    | 0%  | 115.0%         |               |               |  |
| 1510 d0     | 219 | positive | 3.4321 | 3.4287  | 5/6/21 | 3.4203   | 3.4897 | 5/6/21       | 3.4304  | 0.00240416  | 0%         | 112.3% | 3.455         | 0.04907321 | 1%           | 112.1%      | 3.4427   | 0.01739483    | 1%  | 112.2%         |               |               |  |
| 1511 d0     | 220 | positive | 2.951  | 2.9795  | 5/6/21 | 3.0901   | 3.0837 | 5/6/21       | 2.96525 | 0.02015254  | 1%         | 97.1%  | 3.0869        | 0.00452548 | 0%           | 100.2%      | 3.026075 | 0.08601954    | 3%  | 98.6%          |               |               |  |
| 0704 d0     | 221 | positive | 3.3562 | 3.4037  | 5/6/21 | 3.4236   | 3.3086 | 5/6/21       | 3.37995 | 0.03358757  | 1%         | 110.7% | 3.3661        | 0.08131728 | 2%           | 109.2%      | 3.373025 | 0.00979343    | 0%  | 110.0%         |               |               |  |
| 0303 d0     | 222 | positive | 3.0256 | 2.9988  | 5/6/21 | 3.0646   | 3.0312 | 5/6/21       | 3.0122  | 0.01895046  | 1%         | 98.6%  | 3.0479        | 0.02361737 | 1%           | 98.9%       | 3.03005  | 0.02524371    | 1%  | 98.8%          |               |               |  |
| 1512 d0     | 223 | positive | 2.6525 | 2.667   | 5/6/21 | 2.8041   | 2.7747 | 5/6/21       | 2.65975 | 0.01025305  | 0%         | 87.1%  | 2.7894        | 0.02078894 | 1%           | 90.5%       | 2.724575 | 0.09167639    | 3%  | 88.8%          |               |               |  |
| Pos Control |     |          | 3.0711 | 3.0372  | 5/6/21 | 3.093    | 3.0696 | 5/6/21       | 3.05415 | 0.02397092  | 1%         | 100.0% | 3.0813        | 0.0165463  | 1%           | 100.0%      | 3.067725 | 0.01919795    | 1%  | 100.0%         |               |               |  |
| Neg Control |     |          | 0.2499 | 0.2418  | 5/6/21 | 0.2909   | 0.287  | 5/6/21       | 0.24585 | 0.00572756  | 2%         | 8.0%   | 0.28895       | 0.00257722 | 1%           | 9.4%        | 0.2674   | 0.0304763     | 11% | 8.7%           |               |               |  |
|             |     |          |        |         |        |          |        |              |         |             |            |        |               |            |              |             |          |               |     |                |               |               |  |
| 0304 d0     | 224 | positive | 2.6429 | 2.6499  | 5/4/21 | 3.0537   | 2.9874 | 5/4/21       | 2.6464  | 0.00494975  | 0%         | 66.2%  | 3.02055       | 0.04688118 | 2%           | 75.5%       | 2.833475 | 0.264564      | 9%  | 70.8%          |               |               |  |
| 0305 d0     | 225 | positive | 3.1303 | 3.1141  | 5/4/21 | 3.3377   | 3.3361 | 5/4/21       | 3.1222  | 0.01145513  | 0%         | 78.1%  | 3.3369        | 0.00113137 | 0%           | 83.4%       | 3.22955  | 0.15181583    | 5%  | 80.7%          |               |               |  |
| 1202 d0     | 226 | positive | 3.14   | 3.1269  | 5/4/21 | 3.0042   | 3.3562 | 5/4/21       | 3.13345 | 0.0092631   | 0%         | 78.3%  | 3.1802        | 0.24890159 | 8%           | 79.5%       | 3.156825 | 0.03305724    | 1%  | 78.9%          |               |               |  |
| 1203 d0     | 227 | positive | 2.5585 | 2.5867  | 5/4/21 | 3.0293   | 3.012  | 5/4/21       | 2.5726  | 0.01994041  | 1%         | 64.3%  | 3.02065       | 0.01223295 | 0%           | 75.5%       | 2.796625 | 0.31681919    | 11% | 69.9%          |               |               |  |
| Sac Stray   | 228 | positive | 1.6439 | 1.6369  | 5/4/21 | 1.8279   | 1.7965 | 5/4/21       | 1.6404  | 0.00494975  | 0%         | 41.0%  | 1.8122        | 0.0220315  | 1%           | 45.3%       | 1.7263   | 0.12148095    | 7%  | 43.2%          |               |               |  |
| Potty Mouth | 229 | positive | 3.5434 | 3.526   | 5/4/21 | 3.5749   | 3.487  | 5/4/21       | 3.5347  | 0.01230366  | 0%         | 88.4%  | 3.53095       | 0.06215469 | 2%           | 88.3%       | 3.532825 | 0.00265165    | 0%  | 88.3%          |               |               |  |
| 1002        | 230 | positive | 3.5215 | 3.4915  | 5/4/21 | 3.5715   | 3.5774 | 5/4/21       | 3.5065  | 0.0212132   | 1%         | 87.7%  | 3.57445       | 0.00417193 | 0%           | 89.4%       | 3.540475 | 0.04804791    | 1%  | 88.5%          |               |               |  |
| Bandit      | 231 | positive | 3.4054 | 3.4354  | 5/4/21 | 3.5008   | 3.4584 | 5/4/21       | 3.4204  | 0.0212132   | 1%         | 85.5%  | 3.4796        | 0.02998133 | 1%           | 87.0%       | 3.45     | 0.04186072    | 1%  | 86.3%          |               |               |  |
| Little Guy  | 232 | positive | 2.3663 | 2.3183  | 5/4/21 | 2.8537   | 2.7393 | 5/4/21       | 2.3423  | 0.03394113  | 1%         | 58.6%  | 2.7965        | 0.08089302 | 3%           | 69.9%       | 2.5694   | 0.3211679     | 12% | 64.2%          |               |               |  |
| 0701 d0     | 233 | positive | 1.833  | 1.824   | 5/4/21 | 2.2404   | 2.1109 | 5/4/21       | 1.8285  | 0.00636396  | 0%         | 45.7%  | 2.17565       | 0.09157033 | 4%           | 54.4%       | 2.002075 | 0.24547212    | 12% | 50.1%          |               |               |  |
| 0601 d0     | 234 | positive | 2.0776 | 2.1724  | 5/4/21 | 2.3496   | 2.3031 | 5/4/21       | 2.125   | 0.06703372  | 3%         | 53.1%  | 2.32635       | 0.03288047 | 1%           | 58.2%       | 2.225675 | 0.14237595    | 6%  | 55.6%          |               |               |  |
| 1504-       | 301 | negative | 0.1973 | 0.1937  | 5/4/21 | 0.2459   | 0.2342 | 5/4/21       | 0.1955  | 0.00254558  | 1%         | 4.9%   | 0.24005       | 0.00827315 | 3%           | 6.0%        | 0.217775 | 0.03150161    | 14% | 5.4%           |               |               |  |
| 0702-       | 302 | negative | 0.3035 | 0.2864  | 5/4/21 | 0.3705   | 0.3734 | 5/4/21       | 0.29495 | 0.01209153  | 4%         | 7.4%   | 0.37195       | 0.00205061 | 1%           | 9.3%        | 0.33345  | 0.05444722    | 16% | 8.3%           |               |               |  |
| 1509-       | 303 | negative | 0.1489 | 0.1491  | 5/4/21 | 0.1771   | 0.1859 | 5/4/21       | 0.149   | 0.00014142  | 0%         | 3.7%   | 0.1815        | 0.00622254 | 3%           | 4.5%        | 0.16525  | 0.02298097    | 14% | 4.1%           |               |               |  |
| 1001-       | 304 | negative | 0.4283 | 0.4352  | 5/4/21 | 0.5453   | 0.5554 | 5/4/21       | 0.43175 | 0.00487904  | 1%         | 10.8%  | 0.55035       | 0.00714178 | 1%           | 13.8%       | 0.49105  | 0.08386286    | 17% | 12.3%          |               |               |  |
| 1513-       | 305 | negative | 0.1934 | 0.193   | 5/4/21 | 0.2561   | 0.2585 | 5/4/21       | 0.1932  | 0.00028284  | 0%         | 4.8%   | 0.2573        | 0.00169706 | 1%           | 6.4%        | 0.22525  | 0.04532554    | 20% | 5.6%           |               |               |  |
| Fat Tony-   | 306 | negative | 0.293  | 0.285   | 5/4/21 | 0.3563   | 0.3724 | 5/4/21       | 0.289   | 0.00556585  | 2%         | 7.2%   | 0.36435       | 0.01138442 | 3%           | 9.1%        | 0.326675 | 0.0532805     | 16% | 8.2%           |               |               |  |
| Squeak-     | 307 | negative | 0.162  | 0.1557  | 5/4/21 | 0.1977   | 0.2012 | 5/4/21       | 0.15885 | 0.00445477  | 3%         | 4.0%   | 0.19945       | 0.00247487 | 1%           | 5.0%        | 0.17915  | 0.02870854    | 16% | 4.5%           |               |               |  |
| Jamiraquoi- | 308 | negative | 0.3572 | 0.367   | 5/4/21 | 0.4498   | 0.4324 | 5/4/21       | 0.3621  | 0.00692965  | 2%         | 9.1%   | 0.4411        | 0.01230366 | 3%           | 11.0%       | 0.4016   | 0.05586144    | 14% | 10.0%          |               |               |  |
| Prince-     | 309 | negative | 0.1127 | 0.1112  | 5/4/21 | 0.1466   | 0.1454 | 5/4/21       | 0.11195 | 0.00106066  | 1%         | 2.8%   | 0.146         | 0.00084853 | 1%           | 3.7%        | 0.128975 | 0.02407699    | 19% | 3.2%           |               |               |  |
| 0306 d0-    | 310 | negative | 0.1374 | 0.1403  | 5/4/21 | 0.1641   | 0.1651 | 5/4/21       | 0.13885 | 0.00205061  | 1%         | 3.5%   | 0.1646        | 0.00070711 | 0%           | 4.1%        | 0.151725 | 0.018208      | 12% | 3.8%           |               |               |  |
| Pepper      | 235 | positive | 2.1448 | 2.1401  | 5/4/21 | 2.3425   | 2.3111 | 5            |         |             |            |        |               |            |              |             |          |               |     |                |               |               |  |

| IgG Raw Data |        |          |         |        |          |        |              |             |            |            |               |              |             |            |               |                |               |               |     |        |
|--------------|--------|----------|---------|--------|----------|--------|--------------|-------------|------------|------------|---------------|--------------|-------------|------------|---------------|----------------|---------------|---------------|-----|--------|
| Cat name     | Cat ID | ddPCR    | Plate I | Date   | Plate II | Date   | Plate I Mean | Plate I Std | Plate I CV | %PP        | Plate II Mean | Plate II Std | Plate II CV | %PP        | Inter plate m | Inter plate St | Interplate CV | All sample PP |     |        |
| Dexter       | 201    | positive | 0.9427  | 0.9338 | 5/3/21   | 1.3311 | 1.3227       | 5/3/21      | 0.93825    | 0.00629325 | 1%            | 38.0%        | 1.3269      | 0.0059397  | 0%            | 48.4%          | 1.132575      | 0.27481705    | 24% | 43.5%  |
| 0501 d0      | 202    | positive | 0.3597  | 0.3642 | 5/6/21   | 0.388  | 0.3614       | 5/6/21      | 0.36195    | 0.00318198 | 1%            | 15.7%        | 0.3747      | 0.00188094 | 5%            | 14.9%          | 0.368325      | 0.00901561    | 2%  | 15.3%  |
| 0801 d0      | 204    | positive | 0.24    | 0.2366 | 5/6/21   | 0.2932 | 0.2711       | 5/6/21      | 0.2383     | 0.00240416 | 1%            | 10.3%        | 0.28215     | 0.01562706 | 6%            | 11.2%          | 0.260225      | 0.03100663    | 12% | 10.8%  |
| 1501 d0      | 205    | positive | 1.4091  | 1.3876 | 5/3/21   | 1.4233 | 1.3625       | 5/3/21      | 1.39835    | 0.0152028  | 1%            | 56.7%        | 1.3929      | 0.04299209 | 3%            | 50.8%          | 1.395625      | 0.00385373    | 0%  | 53.6%  |
| 1502 d0      | 206    | positive | 0.4166  | 0.3994 | 5/6/21   | 0.4834 | 0.5041       | 5/6/21      | 0.408      | 0.01216224 | 3%            | 17.7%        | 0.49375     | 0.01463711 | 3%            | 19.6%          | 0.450875      | 0.06063441    | 13% | 18.7%  |
| 1503 d0      | 207    | positive | 2.5665  | 2.6172 | 5/3/21   | 2.8742 | 2.8975       | 5/3/21      | 2.59185    | 0.03585031 | 1%            | 105.0%       | 2.88585     | 0.01647559 | 1%            | 105.3%         | 2.73885       | 0.20788939    | 8%  | 105.1% |
| 1505 d0      | 208    | positive | 0.814   | 0.7716 | 5/6/21   | 0.9241 | 0.9189       | 5/6/21      | 0.7928     | 0.02998133 | 4%            | 34.4%        | 0.9215      | 0.00367696 | 0%            | 36.5%          | 0.85715       | 0.09100464    | 11% | 35.5%  |
| 1506 d0      | 209    | positive | 1.161   | 1.1678 | 5/3/21   | 1.2052 | 1.2066       | 5/3/21      | 1.1644     | 0.00480883 | 0%            | 47.2%        | 1.2059      | 0.00098995 | 0%            | 44.0%          | 1.18515       | 0.02934493    | 2%  | 45.5%  |
| 1507 d0      | 210    | positive | 0.9082  | 0.9154 | 5/3/21   | 1.1142 | 1.0839       | 5/3/21      | 0.9118     | 0.00519117 | 1%            | 36.9%        | 1.09905     | 0.02142534 | 2%            | 40.1%          | 1.005425      | 0.13240574    | 13% | 38.6%  |
| 1508 d0      | 211    | positive | 0.2354  | 0.2439 | 5/6/21   | 0.2906 | 0.3031       | 5/6/21      | 0.23965    | 0.00601041 | 3%            | 10.4%        | 0.29685     | 0.00883883 | 3%            | 11.8%          | 0.26825       | 0.04044651    | 15% | 11.1%  |
| 0901 d0      | 212    | positive | 0.7645  | 0.7547 | 5/3/21   | 0.9127 | 0.9753       | 5/3/21      | 0.7596     | 0.00629565 | 1%            | 30.8%        | 0.944       | 0.04426488 | 5%            | 34.4%          | 0.8518        | 0.13039049    | 15% | 32.7%  |
| 0902 d0      | 213    | positive | 1.4141  | 1.3277 | 5/3/21   | 1.6325 | 1.6805       | 5/3/21      | 1.3709     | 0.06109403 | 4%            | 55.5%        | 1.6565      | 0.03394113 | 2%            | 60.4%          | 1.5137        | 0.2019497     | 13% | 58.1%  |
| Squeaky      | 214    | positive | 0.4726  | 0.4641 | 5/3/21   | 0.6499 | 0.6615       | 5/3/21      | 0.46835    | 0.00601041 | 1%            | 19.0%        | 0.6557      | 0.00820244 | 1%            | 23.9%          | 0.562025      | 0.13247646    | 24% | 21.6%  |
| 0301 d0      | 215    | positive | 1.3034  | 1.2113 | 5/6/21   | 1.4568 | 1.4854       | 5/6/21      | 1.25735    | 0.06512453 | 5%            | 54.6%        | 1.4711      | 0.02022325 | 1%            | 58.3%          | 1.364225      | 0.15114407    | 11% | 56.5%  |
| 0703 d0      | 216    | positive | 1.8575  | 1.9637 | 5/3/21   | 2.2203 | 2.158        | 5/3/21      | 1.9106     | 0.07509474 | 4%            | 77.4%        | 2.18915     | 0.04405275 | 2%            | 79.9%          | 2.049875      | 0.19696459    | 10% | 78.7%  |
| 0903 d0      | 217    | positive | 0.2574  | 0.2745 | 5/3/21   | 0.3957 | 0.3855       | 5/3/21      | 0.26595    | 0.01209153 | 5%            | 10.8%        | 0.3906      | 0.00721249 | 2%            | 14.2%          | 0.328275      | 0.08814086    | 27% | 12.6%  |
| 1201 d0      | 218    | positive | 1.9876  | 2.0434 | 5/3/21   | 2.1841 | 2.094        | 5/3/21      | 2.0155     | 0.03945656 | 2%            | 81.7%        | 2.13905     | 0.06371032 | 3%            | 78.0%          | 2.077275      | 0.08736304    | 4%  | 79.7%  |
| 1510 d0      | 219    | positive | 2.1862  | 2.2923 | 5/3/21   | 2.5311 | 2.6694       | 5/3/21      | 2.23925    | 0.07502403 | 3%            | 90.7%        | 2.60025     | 0.09779287 | 4%            | 94.8%          | 2.41975       | 0.25526555    | 11% | 92.9%  |
| 1511 d0      | 220    | positive | 1.1933  | 1.2561 | 5/3/21   | 1.5444 | 1.6545       | 5/3/21      | 1.2247     | 0.04440631 | 4%            | 49.6%        | 1.59945     | 0.07885246 | 5%            | 58.3%          | 1.412075      | 0.26498827    | 19% | 54.2%  |
| 0704 d0      | 221    | positive | 1.7443  | 1.8905 | 5/3/21   | 2.2736 | 2.3997       | 5/3/21      | 1.8174     | 0.10337901 | 6%            | 73.6%        | 2.33665     | 0.08916617 | 4%            | 85.2%          | 2.077025      | 0.3671652     | 18% | 79.7%  |
| 0303 d0      | 222    | positive | 1.8692  | 1.9224 | 5/3/21   | 2.2632 | 2.2117       | 5/3/21      | 1.8958     | 0.03761808 | 2%            | 76.8%        | 2.23745     | 0.036416   | 2%            | 81.6%          | 2.066625      | 0.24158303    | 12% | 79.3%  |
| 1512 d0      | 223    | positive | 1.6833  | 1.7429 | 5/3/21   | 2.2766 | 2.2227       | 5/3/21      | 1.7131     | 0.04214356 | 2%            | 69.4%        | 2.24965     | 0.03811306 | 2%            | 82.1%          | 1.981375      | 0.37939814    | 19% | 76.1%  |
| Pos Control  |        |          | 2.5374  | 2.3992 | 5/3/21   | 2.7342 | 2.7489       | 5/3/21      | 2.4683     | 0.09772216 | 4%            | 100.0%       | 2.74155     | 0.01039447 | 0%            | 100.0%         | 2.604925      | 0.19321693    | 7%  | 100.0% |
| Neg Control  |        |          | 0.1424  | 0.1441 | 5/3/21   | 0.1718 | 0.1727       | 5/3/21      | 0.14325    | 0.00120208 | 1%            | 5.8%         | 0.17225     | 0.0006364  | 0%            | 6.3%           | 0.15775       | 0.0205061     | 13% | 6.1%   |
| 0304 d0      | 224    | positive | 1.158   | 1.1385 | 5/4/21   | 0.905  | 0.9454       | 5/4/21      | 1.14825    | 0.01378858 | 1%            | 52.1%        | 0.9252      | 0.02856711 | 3%            | 46.5%          | 1.036725      | 0.15772017    | 15% | 49.4%  |
| 0305 d0      | 225    | positive | 0.7284  | 0.7214 | 5/4/21   | 0.6317 | 0.5741       | 5/4/21      | 0.7249     | 0.00494975 | 1%            | 32.9%        | 0.6029      | 0.04072935 | 7%            | 30.3%          | 0.6639        | 0.08626703    | 13% | 31.6%  |
| 1202 d0      | 226    | positive | 1.5525  | 1.6161 | 5/4/21   | 1.4018 | 1.4292       | 5/4/21      | 1.5843     | 0.04497199 | 3%            | 71.8%        | 1.4155      | 0.01937473 | 1%            | 71.1%          | 1.4999        | 0.11935962    | 8%  | 71.5%  |
| 1203 d0      | 227    | positive | 1.8536  | 1.8906 | 5/4/21   | 1.5557 | 1.5538       | 5/4/21      | 1.8721     | 0.02616295 | 1%            | 84.9%        | 1.55475     | 0.00134235 | 0%            | 78.1%          | 1.713425      | 0.22440034    | 13% | 81.7%  |
| Sac Stray    | 228    | positive | 1.2426  | 1.2124 | 5/4/21   | 1.0316 | 1.0129       | 5/4/21      | 1.2275     | 0.02135462 | 2%            | 55.7%        | 1.02225     | 0.01322229 | 1%            | 51.4%          | 1.124875      | 0.14513367    | 13% | 53.6%  |
| Potty Mouth  | 229    | positive | 1.7506  | 1.5932 | 5/4/21   | 1.5134 | 1.391        | 5/4/21      | 1.6719     | 0.01129861 | 7%            | 75.8%        | 1.4522      | 0.00654987 | 6%            | 73.0%          | 1.56205       | 0.15535136    | 10% | 74.5%  |
| 1002         | 230    | positive | 0.8409  | 0.8421 | 5/4/21   | 0.6905 | 0.6923       | 5/4/21      | 0.8415     | 0.00084853 | 0%            | 38.2%        | 0.6914      | 0.00127279 | 0%            | 34.7%          | 0.76645       | 0.10613673    | 14% | 36.5%  |
| Bandit       | 231    | positive | 1.6261  | 1.4593 | 5/4/21   | 1.4618 | 1.4444       | 5/4/21      | 1.5427     | 0.11794541 | 8%            | 69.9%        | 1.4531      | 0.01230366 | 1%            | 73.0%          | 1.4979        | 0.06335677    | 4%  | 71.4%  |
| Little Guy   | 232    | positive | 0.6696  | 0.6682 | 5/4/21   | 0.5482 | 0.534        | 5/4/21      | 0.6689     | 0.00098995 | 0%            | 30.3%        | 0.5411      | 0.01004092 | 2%            | 27.2%          | 0.605         | 0.09036825    | 15% | 28.8%  |
| 0701 d0      | 233    | positive | 0.6791  | 0.6123 | 5/4/21   | 0.5403 | 0.5225       | 5/4/21      | 0.6457     | 0.04723473 | 7%            | 29.3%        | 0.5314      | 0.0125865  | 2%            | 26.7%          | 0.58855       | 0.08082231    | 14% | 28.1%  |
| 0601 d0      | 234    | positive | 1.1169  | 1.1354 | 5/4/21   | 0.9933 | 0.9869       | 5/4/21      | 1.12615    | 0.01308148 | 1%            | 51.1%        | 0.9901      | 0.00452548 | 0%            | 49.7%          | 1.058125      | 0.09620188    | 9%  | 50.4%  |
| 1504-        | 301    | negative | 0.1102  | 0.1438 | 5/4/21   | 0.0925 | 0.0916       | 5/4/21      | 0.127      | 0.02375879 | 19%           | 5.8%         | 0.09205     | 0.0006364  | 1%            | 4.6%           | 0.109525      | 0.02471338    | 23% | 5.2%   |
| 0702-        | 302    | negative | 0.0843  | 0.0785 | 5/4/21   | 0.0712 | 0.0751       | 5/4/21      | 0.0814     | 0.00410122 | 5%            | 3.7%         | 0.07315     | 0.00275772 | 4%            | 3.7%           | 0.077275      | 0.00583363    | 8%  | 3.7%   |
| 1509-        | 303    | negative | 0.1239  | 0.077  | 5/4/21   | 0.0733 | 0.0721       | 5/4/21      | 0.10045    | 0.03316331 | 33%           | 4.6%         | 0.0727      | 0.00084853 | 1%            | 3.7%           | 0.086575      | 0.01962221    | 23% | 4.1%   |
| 1001-        | 304    | negative | 0.0792  | 0.0707 | 5/4/21   | 0.0659 | 0.0667       | 5/4/21      | 0.07495    | 0.00601041 | 8%            | 3.4%         | 0.0663      | 0.00056569 | 1%            | 3.3%           | 0.070625      | 0.00611647    | 9%  | 3.4%   |
| 1513-        | 305    | negative | 0.1172  | 0.1183 | 5/4/21   | 0.111  | 0.1043       | 5/4/21      | 0.11775    | 0.00077782 | 1%            | 5.3%         | 0.10765     | 0.00473762 | 4%            | 5.4%           | 0.1127        | 0.00714178    | 6%  | 5.4%   |
| Fat Tony     | 306    | negative | 0.0938  | 0.0862 | 5/4/21   | 0.0871 | 0.0938       | 5/4/21      | 0.09       | 0.00537401 | 6%            | 4.1%         | 0.09045     | 0.00473762 | 5%            | 4.5%           | 0.090225      | 0.0003182     | 0%  | 4.3%   |
| Squeak-      | 307    | negative | 0.0926  | 0.0865 | 5/4/21   | 0.086  | 0.0848       | 5/4/21      | 0.08955    | 0.00431335 | 5%            | 4.1%         | 0.0854      | 0.00084853 | 1%            | 4.3%           | 0.087475      | 0.00293449    | 3%  | 4.2%   |
| Jamiraquai   | 308    | negative | 0.0563  | 0.055  | 5/4/21   | 0.053  | 0.0539       | 5/4/21      | 0.05565    | 0.00091924 | 2%            | 2.5%         | 0.05345     | 0.0006364  | 1%            | 2.7%           | 0.05455       | 0.00155563    | 3%  | 2.6%   |
| Prince       | 309    | negative | 0.0588  | 0.0568 | 5/4/21   | 0.0517 | 0.0518       | 5/4/21      | 0.0578     | 0.00141421 | 2%            | 2.6%         | 0.05175     | 0.0711E-05 | 0%            | 2.6%           | 0.054775      | 0.004278      | 8%  | 2.6%   |
| 0306 d0      | 310    | negative | 1.118   | 0.9837 | 5/4/21   | 1.0048 | 0.9433       | 5/4/21      | 1.05085    | 0.09496444 | 9%            | 47.6%        | 0.97405     | 0.04348707 | 4%            | 48.9%          | 1.01245       | 0.0543058     | 5%  | 48.3%  |
| Pepper       | 235    | positive | 0.296   | 0.2882 | 5/4/21   | 0.2393 | 0.2262       | 5/4/21      | 0.2921     | 0.00551543 | 2%            | 13.2%        | 0.2917      | 0.0092631  | 4%            | 11.7%          | 0.262425      | 0.04196679    | 16% | 12.5%  |
| Aggie        | 401    | positive | 0.3277  | 0.3621 | 5/4/21   | 0.2973 | 0.3234       | 5/4/21      | 0.3449     | 0.02432447 | 7%            | 15.6%        | 0.31035     | 0.01845549 | 6%            | 15.6%          | 0.327625      | 0.02443054    | 7%  | 15.6%  |
| BJ           | 402    | positive | 0.3855  | 0.367  | 5/4/21   | 0.2926 | 0.2859       | 5/4/21      | 0.37625    | 0.01308148 | 3%            | 17.1%        | 0.28925     | 0.00473762 | 2%            | 14.5%          | 0.33275       | 0.06151829    | 18% | 15.9%  |
| AI           | 403    | positive | 0.7324  | 0.6552 | 5/4/21   | 0.5534 | 0.6023       | 5/4/21      | 0.6938     | 0.05458864 | 8%            | 31.5%        | 0.57785     | 0.03457752 | 6%            | 29.0%          | 0.635825      | 0.08198903    | 13% | 30.3%  |
| goose        | 404    | positive | 1.2331  | 1.186  | 5/4/21   | 1.0357 | 1.1243       | 5/4/21      | 1.20955    | 0.03330473 | 3%            | 54.8%        | 1.08        | 0.06264966 | 6%            | 54.3%          | 1.144775      | 0.09160568    | 8%  | 54.6%  |
| Pos Control  |        |          | 2.1622  | 2.2489 | 5/4/21   | 1.9409 | 2.0402       | 5/4/21      | 2.20555    | 0.06130616 | 3%            | 100.0%       | 1.99055     | 0.0702157  | 4%            | 100.0%         | 2.09805       | 0.15202796    | 7%  | 100.0% |
| Neg Control  |        |          | 0.1183  | 0.1318 | 5/4/21   | 0.1088 | 0.1076       | 5/4/21      | 0.12505    | 0.00954594 | 8%            | 5.7%         | 0.1082      | 0.00084853 | 1%            | 5.4%           | 0.116625      | 0.01191475    | 10% | 5.6%   |
| 95           | 101    | negative | 0.0583  | 0.06   | 5/5/21   | 0.0553 | 0.0515       | 5/5/21      | 0.05915    | 0.00120208 | 2%            | 5.3%         | 0.0534      | 0.00268701 | 5%            | 5.2%           | 0.056275      | 0.00406586    | 7%  | 5.2%   |
| 109          | 102    | negative | 0.0517  | 0.0523 | 5/5/21   | 0.0552 | 0.0515       | 5/5/21      | 0.052      | 0.00042426 | 1%            | 4.6%         | 0.05335     | 0.0026163  | 5%            | 5.1%           | 0.052675      | 0.00095459    | 2%  | 4.9%   |
| 452          | 103    | negative | 0.0517  | 0.0525 | 5/5/21   | 0.0499 | 0.0555       | 5/5/21      | 0.0521     | 0.00055659 | 1%            | 4.6%         | 0.0527      | 0.00395998 | 8%            | 5.1%           | 0.0524        | 0.00042426    | 1%  | 4.8%   |
| 57           |        |          |         |        |          |        |              |             |            |            |               |              |             |            |               |                |               |               |     |        |
